# Supplementary material
Source: PubMed Central journal article supplement (PMC5548104)
Supplement: NIHMS870144-supplement-Supplement.pdf [file NIHMS870144-supplement-Supplement.pdf]

# THE LANCET **Neurology**

## **Supplementary webappendix**

This webappendix formed part of the original submission and has been peer reviewed. We post it as supplied by the authors.

Supplement to: Guerrini R, Dobyns WB. Malformations of cortical development: clinical features and genetic causes. *Lancet Neurol* 2014; published online June 3. [http://dx.doi.org/10.1016/S1474-4422\(14\)70040-7](http://dx.doi.org/10.1016/S1474-4422(14)70040-7).

**Supplementary Legend for Figure 1. Axial T2-weighted images at the level of the mid-lateral ventricles showing different malformations of cortical development (MCD).** Long arrows show representative areas of cortical malformation (A-D, F, I-O), subcortical band heterotopia (H) or periventricular nodular heterotopia. The short black arrow shows a small periventricular nodular heterotopia (O). Asterisks denote abnormal white matter (B), focal transmantle dysplasia (D), wide inter hemispheric space due to absent corpus callosum (E), a shunt (I), and an open-lip cleft (M). The disorders of brain growth shown include severe congenital microcephaly with a polymicrogyria-like cortical malformation associated with homozygous *WDR62* mutations (A), dysplastic megalencephaly (here hemimegalencephaly) on the right with heterozygous *PTEN* p.Tyr68His mutation (B), megalencephaly and frontal-perisylvian polymicrogyria in an infant with heterozygous *PIK3R2* p.Gly373Arg mutation (C), and focal cortical dysplasia most consistent with type 2b (focal transmantle dysplasia imaged at 7T) (D). Diffuse disorders of neuronal migration include severe lissencephaly with cerebellar hypoplasia and absent corpus callosum with heterozygous *TUBA1A* p.Thr51Ile mutation (E), polymicrogyria-like cortical malformation due to heterozygous *TUBB2B* p.Gly98Arg mutation (F), severe grade 3 classic lissencephaly with heterozygous *LIS1* p.Ile216Lys mutation (G), and diffuse subcortical band heterotopia in a female with heterozygous *DCX* p.Ala204Asp mutation (H). Cobblestone cortical malformations shown include frontal predominant cobblestone malformation in a child with muscle-eye-brain disease and compound heterozygous *POMGnT1* mutations (I), frontal predominant cobblestone malformation in a child with autosomal recessive cutis laxa and homozygous *ATP6V0A2* p.T280fsX285 mutation (J), and posterior predominant cobblestone mutation in a child with congenital muscular dystrophy and homozygous *LAMA2* mutation (K). The next image shows a peroxisomal cortical malformation from a child with Zellweger syndrome (L). Postmigrational MCD shown include classic schizencephaly with an open-lip cleft in the left frontal region (M), and perisylvian polymicrogyria in a child with the common 3 Mb deletion 22q11.2 (N). The last two images show a child with posterior periventricular nodular heterotopia with overlying polymicrogyria (O), and bilateral diffuse periventricular nodular heterotopia in a female with a heterozygous *FLNA* p.Q1346fsX1349 mutation (P). These images come from subjects LR12-220 (A), LR12-123 (B), LR12-303 (C), LR13-rg1 (D), LR09-393 (E), LR02-406 (F), LR10-132 (G), LR12-295 (H), LR12-478 (I), LR07-081 (J), LR09-117a1 (K), LP98-074 (L), LR11-246 (M), LR07-120 (N), LR11-208 (O), and LP99-157a2 (P).

| <b>Supplementary Table 1. Phenotype spectrum observed with 8 tubulinopathy genes</b> |                   |                     |                   |                       |             |
|--------------------------------------------------------------------------------------|-------------------|---------------------|-------------------|-----------------------|-------------|
|                                                                                      | <b>LCH severe</b> | <b>LCH moderate</b> | <b>LIS p&gt;a</b> | <b>PMG-like, CBLH</b> | <b>CBLH</b> |
| <i>TUBA1A</i>                                                                        | +                 | +                   | +                 | +                     | +           |
| <i>TUBA8</i>                                                                         | -                 | -                   | -                 | variant               | -           |
| <i>TUBB5</i>                                                                         | -                 | -                   | -                 | +                     | +           |
| <i>TUBB2B</i>                                                                        | +                 | +                   | -                 | +                     | -           |
| <i>TUBB3</i>                                                                         | -                 | -                   | -                 | +                     | -           |
| <i>TUBG1</i>                                                                         | -                 | -                   | +                 | -                     | -           |
| <i>DYNC1H1</i>                                                                       | -                 | +                   | +                 | -                     | -           |
| <i>KIF2A</i>                                                                         | -                 | -                   | +                 | -                     | -           |

Abbreviations: a, anterior; CBLH, cerebellar hypoplasia; LIS, isolated lissencephaly sequence; LCH, lissencephaly with cerebellar hypoplasia; PMG, polymicrogyria; p, posterior.

| <b>Supplementary Table 2. Comparative imaging features of MCD</b> |                             |                   |                           |                 |                                 |                |                       |             |            |           |
|-------------------------------------------------------------------|-----------------------------|-------------------|---------------------------|-----------------|---------------------------------|----------------|-----------------------|-------------|------------|-----------|
|                                                                   | <b>Brain symmetry (R-L)</b> |                   | <b>Cortical thickness</b> |                 | <b>Cortical surface texture</b> |                | <b>Other features</b> |             |            |           |
|                                                                   | <b>Symmetric</b>            | <b>Asymmetric</b> | <b>&gt;1 cm</b>           | <b>&lt;1 cm</b> | <b>Smooth</b>                   | <b>Pebbled</b> | <b>ACC</b>            | <b>CBLH</b> | <b>PNH</b> | <b>WM</b> |
| MEG-DMEG-FCD II                                                   | +                           | +                 | +                         | +               | -                               | +              | -                     | -           | R          | +         |
| LIS-SBH                                                           | +                           | R*                | +                         | -               | +                               | -              | ±                     | ±           | -          | -         |
| PMG-like (tubulin)                                                | +                           | +                 | -                         | +               | -                               | +              | +                     | +           | R          | -         |
| PMG typical                                                       | +                           | +                 | -                         | +               | -                               | +              | -                     | R           | ±          | -         |
| COB                                                               | +                           | -                 | +                         | +               | +                               | +              | -                     | +           | -          | +         |
| FCD I                                                             | -                           | +                 | -                         | +               | -                               | -              | -                     | -           | -          | -         |
| PNH                                                               | +                           | +                 | na                        | na              | na                              | na             | ±                     | +           | na         | -         |

Abbreviations: ACC, agenesis of the corpus callosum; CBLH, diffuse cerebellar hypoplasia; COB, cobblestone malformation; DMEG, dysplastic megalencephaly; FCD I, focal cortical dysplasia type 1; FCD II, focal cortical dysplasia type 2; L, left; LIS, lissencephaly; MEG, megalencephaly; MCD, malformations of cortical development; PMG, polymicrogyria; PNH, periventricular nodular heterotopia; SBH, subcortical band heterotopia; R, right; R\*, rare feature; WM, abnormal white matter signal (excludes prominent perivascular spaces as these are common to most MCD)

**Supplementary Table 3: Causative genes and phenotype spectrum in cobblestone-type cortical malformations**

| Gene*                                                                                                                                                                                                                                                                                                                                                                                                                                                                                                                                                         | Cyto     | Phenotypes       | References |
|---------------------------------------------------------------------------------------------------------------------------------------------------------------------------------------------------------------------------------------------------------------------------------------------------------------------------------------------------------------------------------------------------------------------------------------------------------------------------------------------------------------------------------------------------------------|----------|------------------|------------|
| <b>Dystroglycanopathies: COB with CMD (anterior predominant, a&gt;p)</b>                                                                                                                                                                                                                                                                                                                                                                                                                                                                                      |          |                  |            |
| B3GALNT2                                                                                                                                                                                                                                                                                                                                                                                                                                                                                                                                                      | 1q42.3   | WWS MEB          | 1          |
| B3GNT1                                                                                                                                                                                                                                                                                                                                                                                                                                                                                                                                                        | 11q13.2  | MEB              | 2          |
| FKRP                                                                                                                                                                                                                                                                                                                                                                                                                                                                                                                                                          | 19q13.32 | WWS MEB CBL-CMD  | 3–5        |
| FKTN                                                                                                                                                                                                                                                                                                                                                                                                                                                                                                                                                          | 9q31.2   | WWS FCMD         | 6, 7       |
| GTDC2                                                                                                                                                                                                                                                                                                                                                                                                                                                                                                                                                         | 3p22.1   |                  | 8          |
| ISPD                                                                                                                                                                                                                                                                                                                                                                                                                                                                                                                                                          | 7p21.2   | WWS              | 9–12       |
| LARGE                                                                                                                                                                                                                                                                                                                                                                                                                                                                                                                                                         | 22q12.3  | WWS MEB          | 13         |
| POMGnT1                                                                                                                                                                                                                                                                                                                                                                                                                                                                                                                                                       | 1p34.1   | MEB              | 14, 15     |
| POMT1                                                                                                                                                                                                                                                                                                                                                                                                                                                                                                                                                         | 9q34.13  | WWS              | 16, 17     |
| POMT2                                                                                                                                                                                                                                                                                                                                                                                                                                                                                                                                                         | 14q24.3  | WWS MEB MIC-CMD  | 18, 19     |
| TMEM5                                                                                                                                                                                                                                                                                                                                                                                                                                                                                                                                                         | 12q14.2  |                  | 11         |
| <b>N- and O-linked glycanopathies: COB with CDG (anterior predominant, a&gt;p)</b>                                                                                                                                                                                                                                                                                                                                                                                                                                                                            |          |                  |            |
| ATP6V0A2                                                                                                                                                                                                                                                                                                                                                                                                                                                                                                                                                      | 12q24.31 | Debre cutis laxa | 20, 21     |
| B4GALT1                                                                                                                                                                                                                                                                                                                                                                                                                                                                                                                                                       | 9p13     | DWM with CDG     | 22, 23     |
| SNAP29                                                                                                                                                                                                                                                                                                                                                                                                                                                                                                                                                        | 22q11.2  | CEDNIK           | 24, 25     |
| SRD5A3                                                                                                                                                                                                                                                                                                                                                                                                                                                                                                                                                        | 4q12     | CHIME-like       | 26         |
| <b>Lamininopathies: COB only or COB with CMD (posterior predominant, p&gt;a)</b>                                                                                                                                                                                                                                                                                                                                                                                                                                                                              |          |                  |            |
| LAMA2                                                                                                                                                                                                                                                                                                                                                                                                                                                                                                                                                         | 6q22.33  | COB p>a, CMD     | 27, 28     |
| LAMB1                                                                                                                                                                                                                                                                                                                                                                                                                                                                                                                                                         | 7q31.1   | COB p>a          | 29         |
| LAMC3                                                                                                                                                                                                                                                                                                                                                                                                                                                                                                                                                         | 9q34.13  | COB p>a          | 30         |
| <b>Collagenopathy: COB only (very preliminary group)</b>                                                                                                                                                                                                                                                                                                                                                                                                                                                                                                      |          |                  |            |
| GPR56                                                                                                                                                                                                                                                                                                                                                                                                                                                                                                                                                         | 16q13    | COB a>p          | 31–33      |
| COL18A1                                                                                                                                                                                                                                                                                                                                                                                                                                                                                                                                                       | 21q22.3  | Knobloch         | 34         |
| <p>Key: COB, cobblestone malformation; CBL-CMD, mental retardation, cerebellar cysts and CMD; CEDNIK, CEDNIK syndrome; Cyto; cytogenetic location; Debre cutis laxa, DWM-CDG, Dandy-Walker malformation with CDG; Debré-type autosomal recessive cutis laxa; FCMD, Fukuyama congenital muscular dystrophy; Knobloch, Knobloch syndrome; MEB, Muscle-eye-brain disease; WWS, Walker-Warburg syndrome. a&gt;p, anterior more severe than posterior; p&gt;a, posterior more severe than anterior.</p> <p>* Protein names are listed in Supplementary Table 4</p> |          |                  |            |

**Supplementary Table 4: Full names for all genes and proteins quoted in this article (abbreviations are listed in alphabetical order)**

$\alpha 1\beta 3$  integrin -  $\alpha 1$  integrin/ $\beta 3$  integrin complex

*ACTB* - actin, beta

*ACTG1* - actin, gamma 1

*AKT* - protein kinase B

*AKT3* - v-akt murine thymoma viral oncogene homolog 3

*AMPK* - AMP-activated protein kinase

*ARFGEF2* - ADP-ribosylation factor guanine nucleotide-exchange factor 2

*ARX* - aristaless related homeobox

*ATP6V0A2* - ATPase, H<sup>+</sup> transporting, lysosomal V0 subunit a2

*B3GALNT2* - beta-1,3-N-acetylgalactosaminyltransferase 2

*B3GNT1* - UDP-GlcNAc:betaGal beta-1,3-N-acetylglucosaminyltransferase 1

*B4GALT1* - UDP-Gal:betaGlcNAc beta 1,4- galactosyltransferase, polypeptide 1

*CHD7* - chromodomain helicase DNA binding protein 7

*COL18A1* - collagen, type XVIII, alpha 1

*CNR* - cederin-related neuronal receptor

*DCX* - doublecortin

*DYNC1H1* - dynein cytoplasmic 1, heavy chain 1

*EOMES* (or *PAX6* or *TBR-2*) - eomesodermin

*EZH2* - lysine N-methyltransferase 6

*FH* - fumarate hydratase

*FKRP* - fukutin related protein

*FKTN* - fukutin

*FLNA* - filamin A

*FOXO* - forkhead box O

*GSK3* - glycogen synthase kinase 3

*GTDC2* - glycosyltransferase-like domain containing protein 2

*GPR56* - G protein-coupled receptor 56

*GPSM2* - G-protein signaling modulator 2

*HIF $\alpha$*  - hypoxia inducible factor 1,  $\alpha$  subunit

*IKK* - *IKK $\alpha$* , *IKK $\beta$* , and *NEMO/IKK $\gamma$*  complex

*ISPD* - isoprenoid synthase domain containing

*I $\kappa$ B* - nuclear factor of  $\kappa$  light polypeptide gene enhancer in B-cells inhibitor

*KIAA1279* - kinesin binding protein KIAA1279

*KIF2A* - kinesin heavy chain member 2<sup>o</sup>

*KIF5C* - kinesin family member 5C

*LAMA2* - laminin, alpha 2

*LAMC3* - laminin, gamma 3

*LAMB1* - laminin, beta 1  
*LARGE* - like-glycosyltransferase  
*LIS1* - platelet-activating factor acetylhydrolase 1b, regulatory subunit 1  
*mDAB1* - dab, reelin signal transducer, homolog 1 (*Drosophila*)  
*MTOR* - mammalian target of rapamycin  
*MTORC1* - MTOR complex 1  
*MTORC2* - MTOR complex 2  
*NF1* - neurofibromin 1  
*NDE1* - nudE neurodevelopment protein 1  
*NFκB* - nuclear factor κ-light-chain-enhancer of activated B cells  
*NKCC1* - Na-K-2Cl- cotransporter  
*NSD1* – nuclear receptor binding SET domain protein 1  
*NSDHL* - NAD(P) dependent steroid dehydrogenase-like  
*OCLN* - occludin  
*P* - inorganic phosphate  
*P60S6K* - 60 kDa ribosomal protein S6 kinase  
*PAFAH1B1* (or *LIS1*) – platelet-activating factor acetylhydrolase 1b, regulatory subunit 1  
*POMGnT1* - protein O-linked mannose N-acetylglucosaminyltransferase 1 (beta 1,2-)  
*PHLPP* - PH-domain leucine-rich-repeat protein phosphatase  
*PIP2* - phosphatidylinositol 4,5-bisphosphate  
*PIP3* - phosphatidylinositol 3,4,5-trisphosphate  
*POMT1* - protein-O-mannosyltransferase 1  
*POMT2* - protein-O-mannosyltransferase 2  
*RNF135* - ring finger protein 135  
*PAX6* - paired box 6  
*PI3K* - phosphatidylinositol 3-kinase  
*PIK3R2* - phosphoinositide-3-kinase, regulatory subunit 2  
*PIK3CA* phosphatidylinositol-4,5-bisphosphate 3-kinase, catalytic subunit alpha  
*PTEN* - phosphatase and tensin homolog  
*RAB3GAP1* - RAB3 GTPase activating protein subunit 1  
*RAB3GAP2* - RAB3 GTPase activating protein subunit 2  
*RAB18* - RAB18, member RAS oncogene family  
*RELN* – reelin  
*SNAP29* - synaptosomal-associated protein, 29kDa  
*SRD5A3* - steroid 5 alpha-reductase 3  
*SRPX2* - sushi-repeat containing protein, X-linked 2  
*TMEM5* - transmembrane protein 5  
*TSC1* - tuberous sclerosis 1  
*TSC2* - tuberous sclerosis 2  
*TUBA1A* - tubulin, alpha 1

TUBA8 - tubulin, alpha 8

TUBB/TUBB5 - tubulin, beta class I/

*TUBB2B* - tubulin, beta 2B class IIb

TUBB3 - tubulin, beta 3 class III

*TUBG1* - tubulin, gamma 1

*VEGF* - vascular endothelial growth factor.

*VLDLR* - very low density lipoprotein receptor

*WDR62* - WD repeat-containing protein 62

*YWHAE* - tyrosine 3-monooxygenase/tryptophan 5-monooxygenase activation protein, epsilon

## REFERENCES for supplementary Table 2

1. Stevens E, Carss KJ, Cirak S, et al. Mutations in B3GALNT2 Cause Congenital Muscular Dystrophy and Hypoglycosylation of alpha-Dystroglycan. *Am J Hum Genet* 2013; 92: 354–65.
2. Buysse K, Riemersma M, Powell G, et al. Missense mutations in beta-1,3-N-acetylglucosaminyltransferase 1 (B3GNT1) cause Walker-Warburg syndrome. *Hum Mol Genet* 2013; 22: 1746–54.
3. Beltran-Valero de Bernabe D, Voit T, Longman C, et al. Mutations in the FKRP gene can cause muscle-eye-brain disease and Walker-Warburg syndrome. *J Med Genet* 2004; 41: e61.
4. Brockington M, Yuva Y, Prandini P, et al. Mutations in the fukutin-related protein gene (FKRP) identify limb girdle muscular dystrophy 2I as a milder allelic variant of congenital muscular dystrophy MDC1C. *Hum Mol Genet* 2001; 10: 2851–9.
5. Mercuri E, Topaloglu H, Brockington M, et al. Spectrum of brain changes in patients with congenital muscular dystrophy and FKRP gene mutations. *Arch Neurol* 2006b; 63: 251–7.
6. Kobayashi K, Nakahori Y, Mizuno K, et al. Founder-haplotype analysis in Fukuyama-type congenital muscular dystrophy (FCMD). *Hum Genet* 1998; 103: 323–7.
7. Manzini MC, Gleason D, Chang BS, et al. Ethnically diverse causes of Walker-Warburg syndrome (WWS): FCMD mutations are a more common cause of WWS outside of the Middle East. *Hum Mutat* 2008; 29: E231–41.
8. Manzini MC, Tambunan DE, Hill RS, et al. Exome sequencing and functional validation in zebrafish identify GTDC2 mutations as a cause of Walker-Warburg syndrome. *Am J Hum Genet* 2012; 91: 541–7.
9. Cirak S, Foley AR, Herrmann R, et al. ISPD gene mutations are a common cause of congenital and limb-girdle muscular dystrophies. *Brain* 2013; 136: 269–81.
10. Roscioli T, Kamsteeg EJ, Buysse K, et al. Mutations in ISPD cause Walker-Warburg syndrome and defective glycosylation of alpha-dystroglycan. *Nat Genet* 2012; 44: 581–5.
11. Vuillaumier-Barrot S, Bouchet-Seraphin C, Chelbi M, et al. Identification of Mutations in TMEM5 and ISPD as a Cause of Severe Cobblestone Lissencephaly. *Am J Hum Genet* 2012; 91: 1135–43.
12. Willer T, Lee H, Lommel M, Yoshida-Moriguchi T, et al. ISPD loss-of-function mutations disrupt dystroglycan O-mannosylation and cause Walker-Warburg syndrome. *Nat Genet* 2012; 44: 575–80.
13. Longman C, Brockington M, Torelli S, et al. Mutations in the human LARGE gene cause MDC1D, a novel form of congenital muscular dystrophy with severe mental retardation and abnormal glycosylation of alpha-dystroglycan. *Hum Mol Genet* 2003; 12: 2853–61.



14. Diesen C, Saarinen A, Pihko H, et al. *POMGnT1* mutation and phenotype spectrum in muscle-eye-brain disease. *J Med Genet* 2004; 41: e115.
15. Yoshida A, Kobayashi K, Manya H, et al. Muscular Dystrophy and Neuronal Migration Disorder Caused by Mutations in a Glycosyltransferase, POMGnT1. *Dev Cell* 2001; 1: 717-24.
16. Beltran-Valero de Bernabe D, Currier S, Steinbrecher A, et al. Mutations in the O-Mannosyltransferase Gene POMT1 Give Rise to the Severe Neuronal Migration Disorder Walker-Warburg Syndrome. *Am J Hum Genet* 2002; 71: 1033-43.
17. Currier SC, Lee CK, Chang BS, et al. Mutations in POMT1 are found in a minority of patients with Walker-Warburg syndrome. *Am J Med Genet A* 2005; 133: 53-7.
18. Mercuri E, D'Amico A, Tessa A, et al. POMT2 mutation in a patient with 'MEB-like' phenotype. *Neuromuscul Disord* 2006a; 16: 446-8.
19. van Reeuwijk J, Janssen M, van den Elzen C, et al. POMT2 mutations cause alpha-dystroglycan hypoglycosylation and Walker-Warburg syndrome. *J Med Genet* 2005; 42: 907-12.
20. Kornak U, Reynders E, Dimopoulou A, et al. Impaired glycosylation and cutis laxa caused by mutations in the vesicular H<sup>+</sup>-ATPase subunit ATP6V0A2. *Nat Genet* 2008; 40: 32-4.
21. Van Maldergem L, Yuksel-Apak M, Kayserili H, et al. Cobblestone-like brain dysgenesis and altered glycosylation in congenital cutis laxa, Debre type. *Neurology* 2008; 71: 1602-8.
22. Hansske B, Thiel C, Lubke T, et al. Deficiency of UDP-galactose:N-acetylglucosamine beta-1,4-galactosyltransferase I causes the congenital disorder of glycosylation type IIId. *J Clin Invest* 2002; 109: 725-33.
23. Peters V, Penzien JM, Reiter G, et al. Congenital disorder of glycosylation IIId (CDG-IIId) -- a new entity: clinical presentation with Dandy-Walker malformation and myopathy. *Neuropediatrics* 2002; 33: 27-32.
24. Fuchs-Telem D, Stewart H, Rapaport D, et al. CEDNIK syndrome results from loss-of-function mutations in SNAP29. *Br J Dermatol* 2011; 164: 610-6.
25. Kudlyk T, Willett R, Pokrovskaya ID, Lupashin V. COG6 interacts with a subset of the Golgi SNAREs and is important for the Golgi complex integrity. *Traffic* 2013; 14: 194-204.
26. Cantagrel V, Lefeber DJ, Ng BG, et al. SRD5A3 is required for converting polyprenol to dolichol and is mutated in a congenital glycosylation disorder. *Cell* 2010; 142: 203-17.
27. Jones KJ, Morgan G, Johnston H, et al. The expanding phenotype of laminin alpha2 chain (merosin) abnormalities: case series and review. *J Med Genet* 2001; 38: 649-57.

28. Philpot J, Cowan F, Pennock J, et al. Merosin-deficient congenital muscular dystrophy: the spectrum of brain involvement on magnetic resonance imaging. *Neuromuscul Disord* 1999; 9: 81–5.
29. Radmanesh F, Caglayan AO, Silhavy JL, et al. Mutations in LAMB1 Cause Cobblestone Brain Malformation without Muscular or Ocular Abnormalities. *Am J Hum Genet* 2013; 92: 468-74.
30. Barak T, Kwan KY, Louvi A, et al. Recessive LAMC3 mutations cause malformations of occipital cortical development. *Nat Genet* 2011; 43: 590–4.
31. Luo R, Jin Z, Deng Y, Strokes N, Piao X. Disease-associated mutations prevent GPR56-collagen III interaction. *PLoS One* 2012; 7: e29818.
32. Piao X, Chang BS, Bodell A, et al. Genotype-phenotype analysis of human frontoparietal polymicrogyria syndromes. *Ann Neurol* 2005; 58: 680–7.
33. Piao X, Hill RS, Bodell A, et al. G protein-coupled receptor-dependent development of human frontal cortex. *Science* 2004; 303: 2033–6.
34. Keren B, Suzuki OT, Gerard-Blanluet M, et al. CNS malformations in Knobloch syndrome with splice mutation in COL18A1 gene. *Am J Med Genet A* 2007; 143: 1514–8.
